# Supplementary material for: In situ metallization of 2D COFs with acid/base site synergistic effects for boosting one-pot CO2 conversion
Source: Royal Society of Chemistry journal article supplement (doi:10.1039/d4ta03530e), 2024-01-01
Supplement: d4ta03530e1.pdf [file d4ta03530e1.pdf]

## Supporting Information

### **In situ metallization of 2D COFs with acid/base sites synergistic effects for boosting one-pot CO<sub>2</sub> conversion**

Yi Yu,<sup>a</sup> Meng Wang,<sup>a</sup> Ying Wu <sup>\*bc</sup> and Hongxia Xi <sup>\*a</sup>

<sup>a</sup> School of Chemistry and Chemical Engineering, South China University of Technology, Guangzhou 510640, China.

<sup>b</sup> School of Chemical Engineering and Light Industry, Guangdong University of Technology, Guangzhou 510006, P. R. China.

<sup>c</sup> Jieyang Branch of Chemistry and Chemical Engineering Guangdong Laboratory (Rongjiang Laboratory), Jieyang 515200, P. R. China.

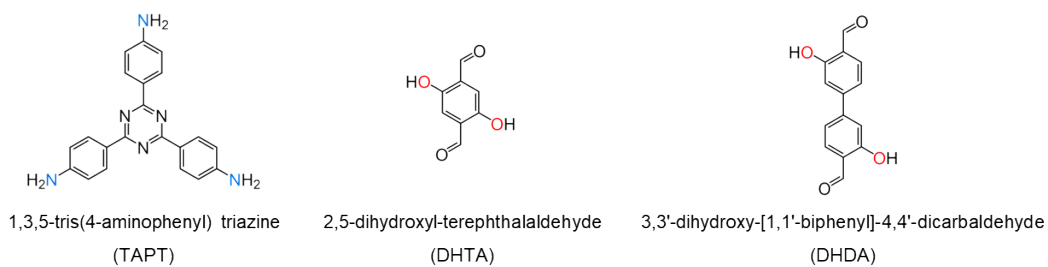

**Fig. S1.** Molecule structures of linkers.

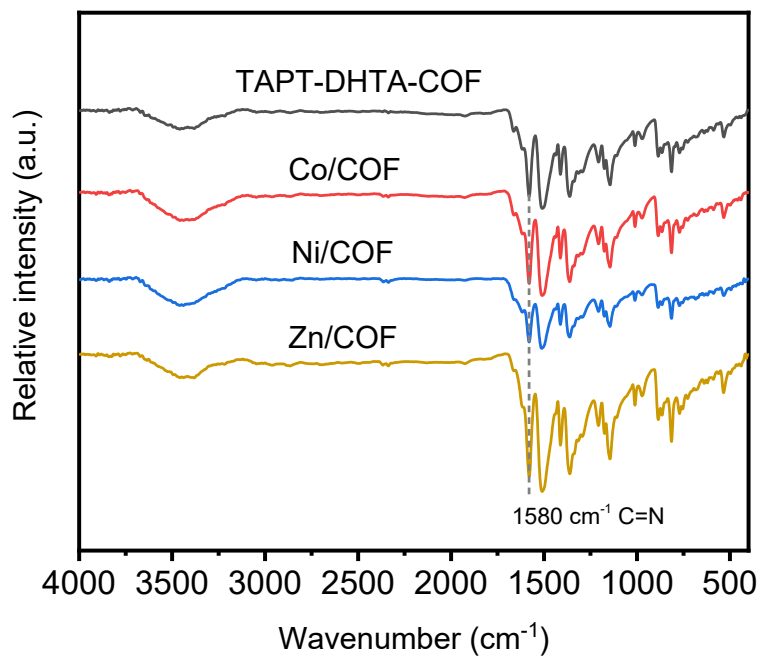

**Fig. S2.** FTIR spectrum of COF materials.

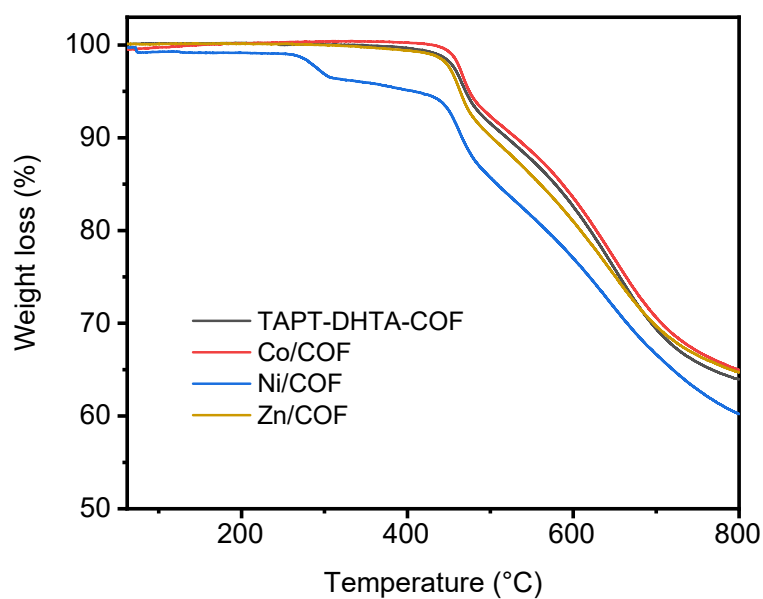

**Fig. S3.** TGA curves of COF materials.

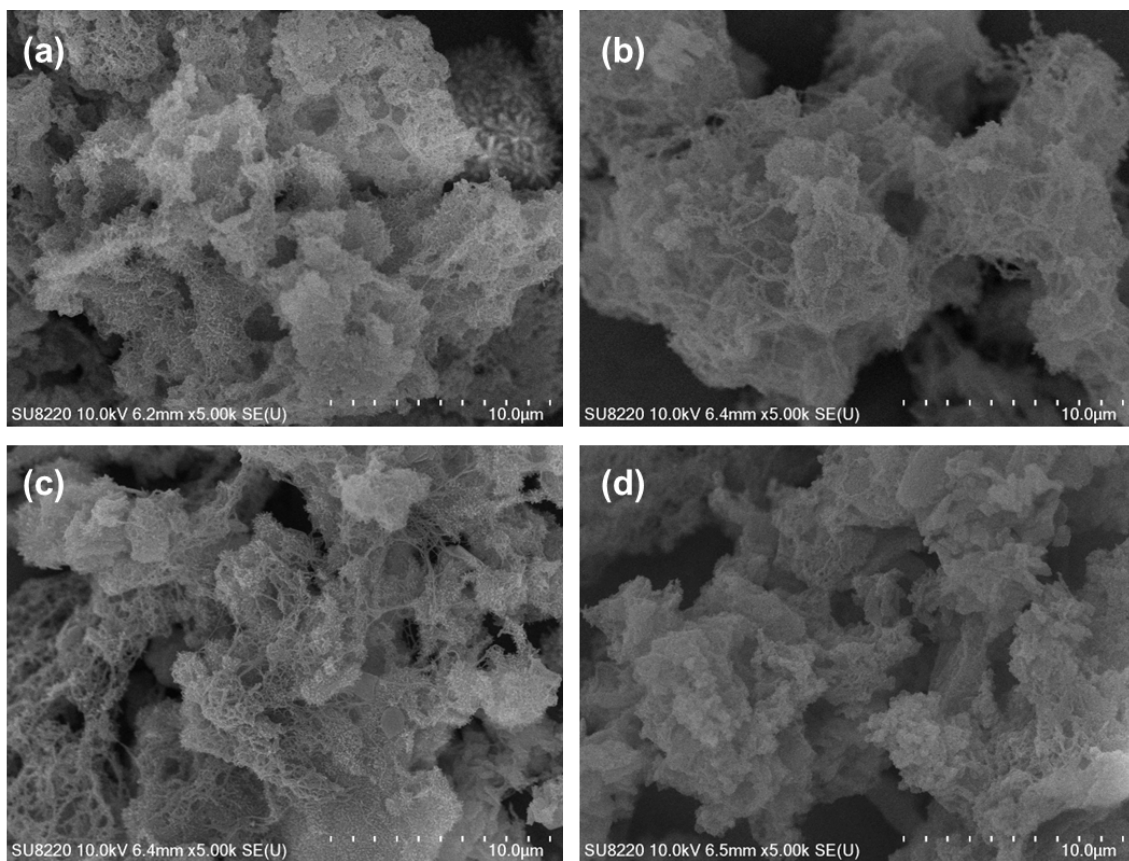

**Fig. S4.** SEM images of (a) TAPT-DHTA-COF, (b) Co/COF, (c) Ni/COF and (d) Zn/COF.

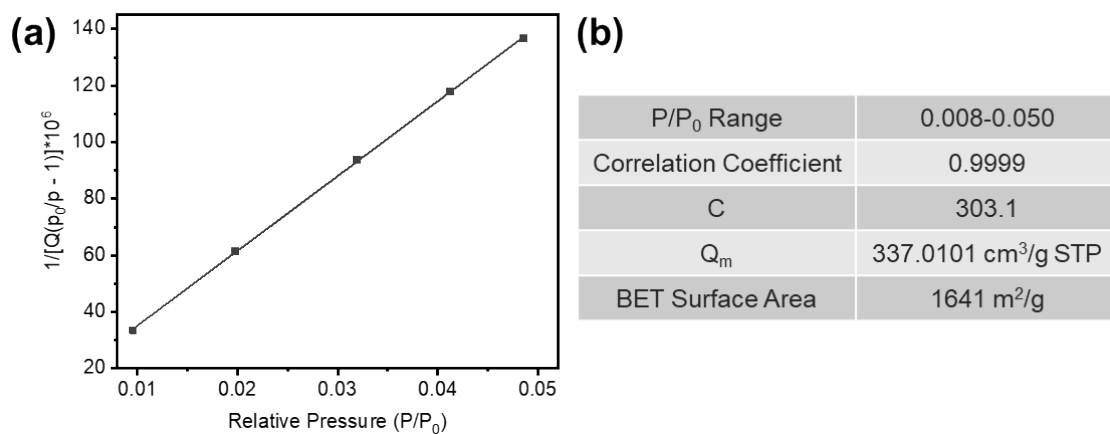

**Fig. S5.** BET analysis of TAPT-DHTA-COF.

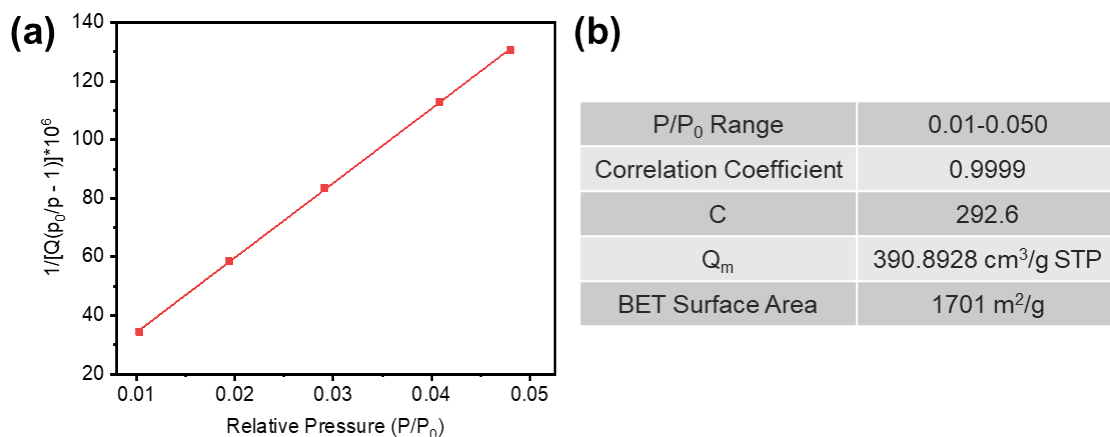

**Fig. S6.** BET analysis of Co/COF.

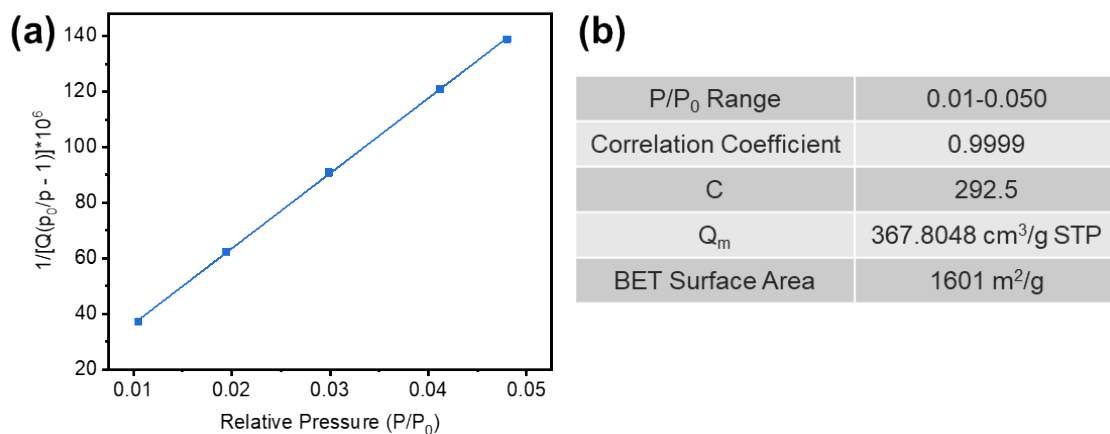

**Fig. S7.** BET analysis of Ni/COF.

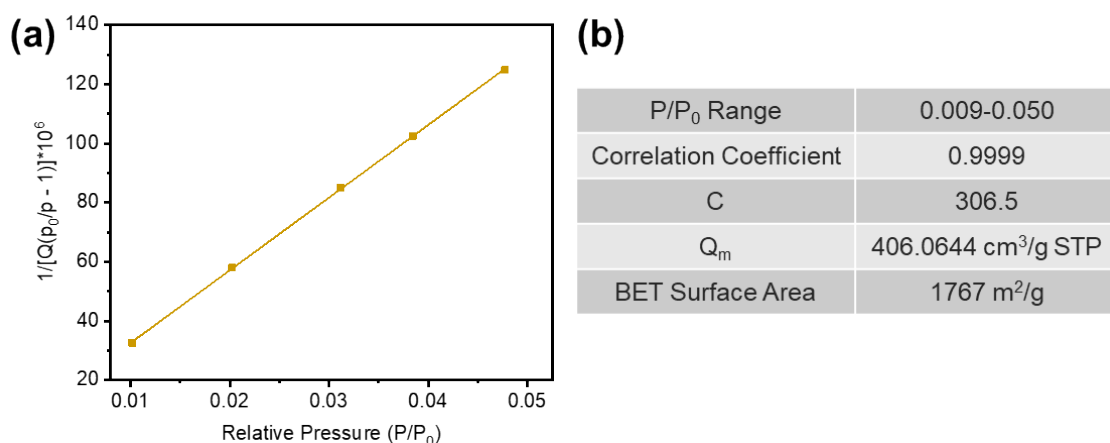

**Fig. S8.** BET analysis of Zn/COF.

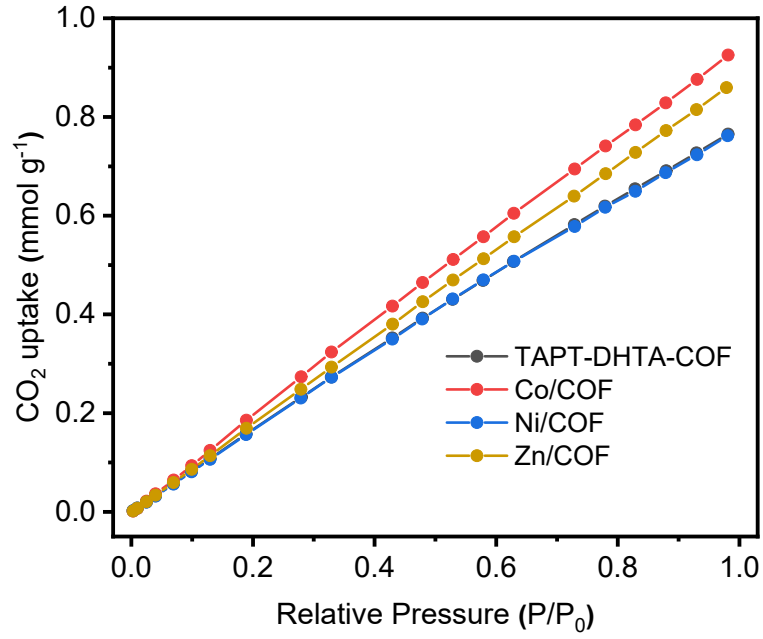

**Fig. S9.** CO<sub>2</sub> adsorption curves of TAPT-DHTA-COF series at 298 K.

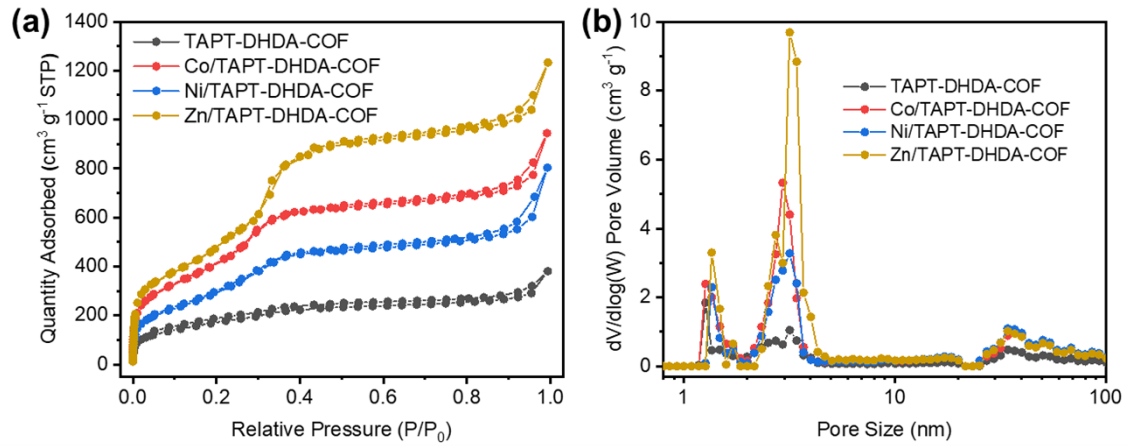

**Fig. S10.** (a) N<sub>2</sub> sorption isotherms and (c) pore distribution of TAPT-DHDA-COF series.

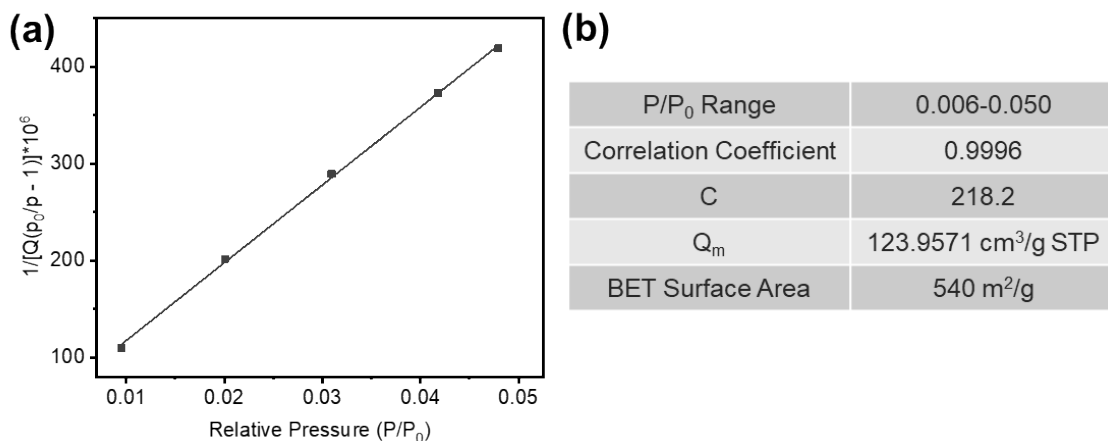

**Fig. S11.** BET analysis of TAPT-DHDA-COF.

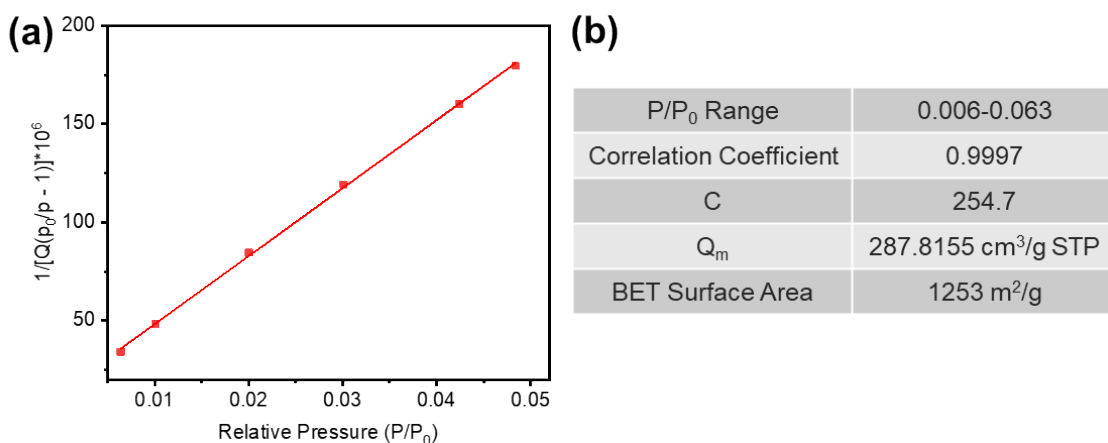

**Fig. S12.** BET analysis of Co/TAPT-DHDA-COF.

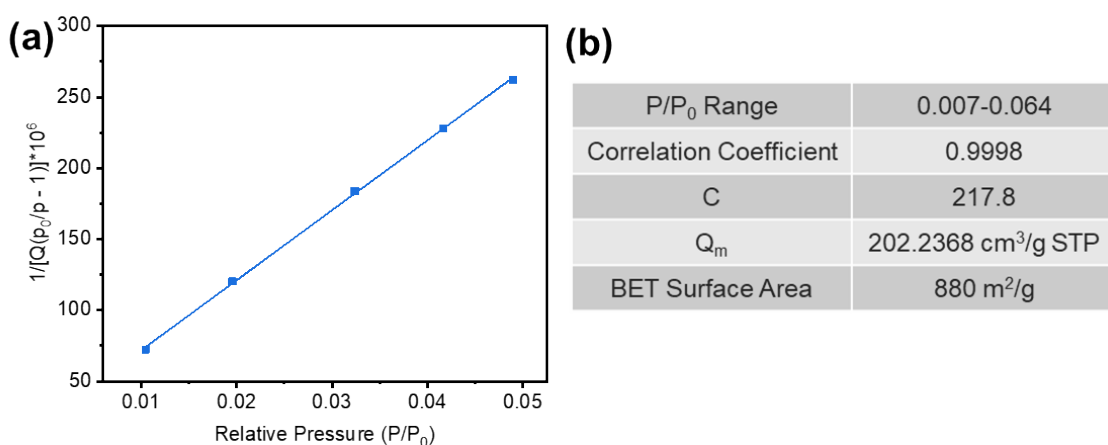

**Fig. S13.** BET analysis of Ni/TAPT-DHDA-COF.

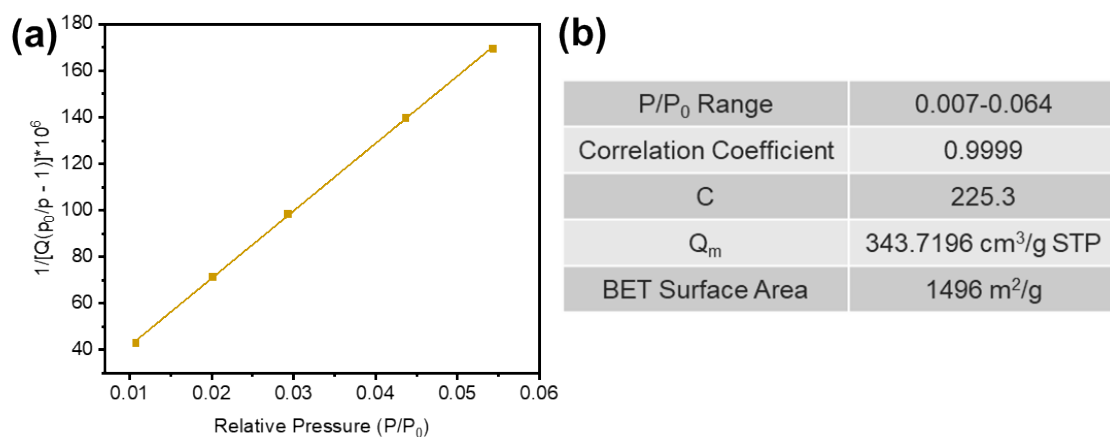

**Fig. S14.** BET analysis of Zn/TAPT-DHDA-COF.

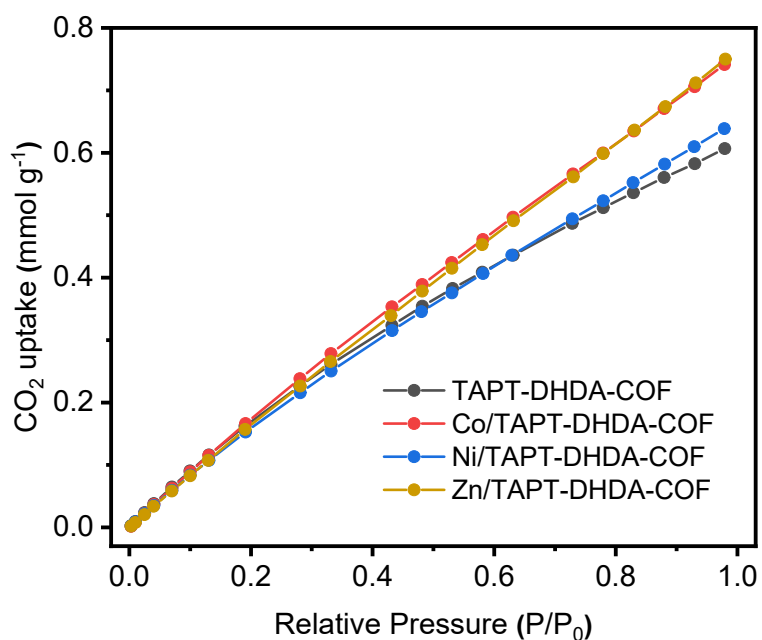

**Fig. S15.** CO<sub>2</sub> adsorption curves of TAPT-DHDA-COF series at 298 K.

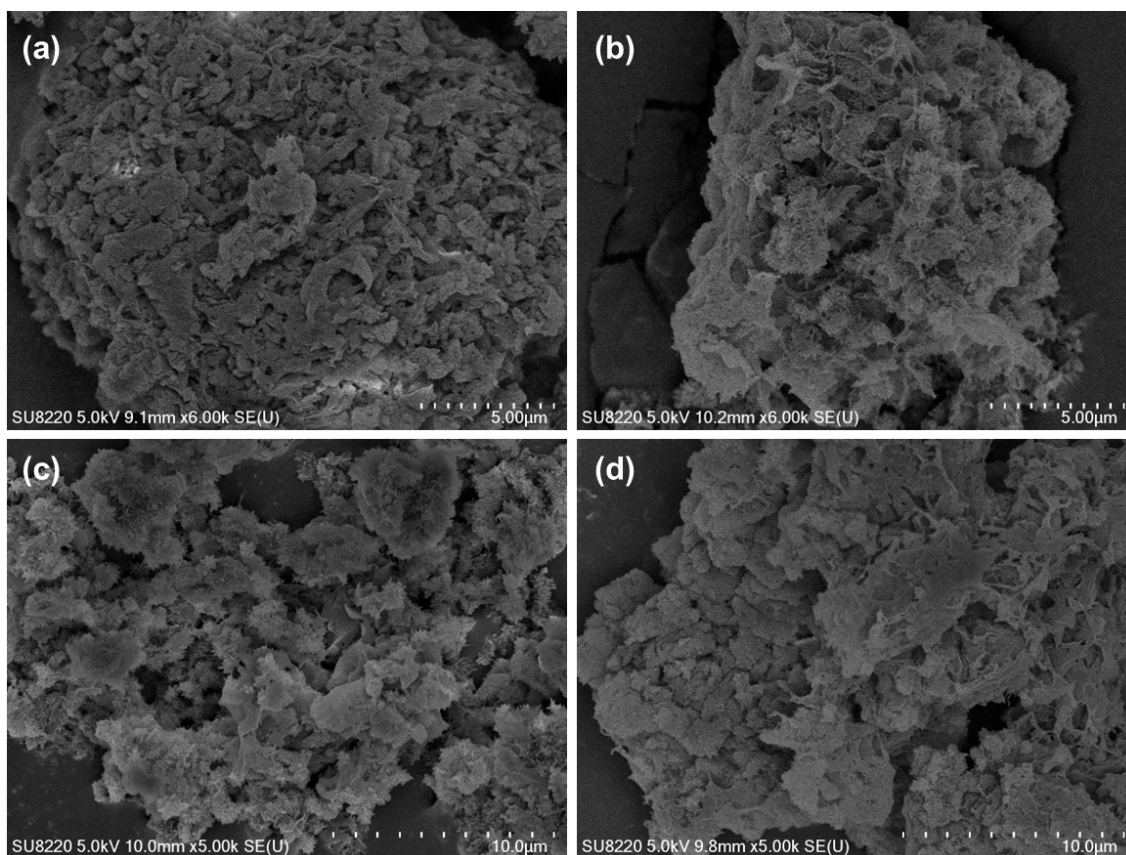

**Fig. S16.** SEM images of (a) TAPT-DHDA-COF, (b) Co/TAPT-DHDA-COF, (c) Ni/TAPT-DHDA-COF and (d) Zn/TAPT-DHDA-COF.

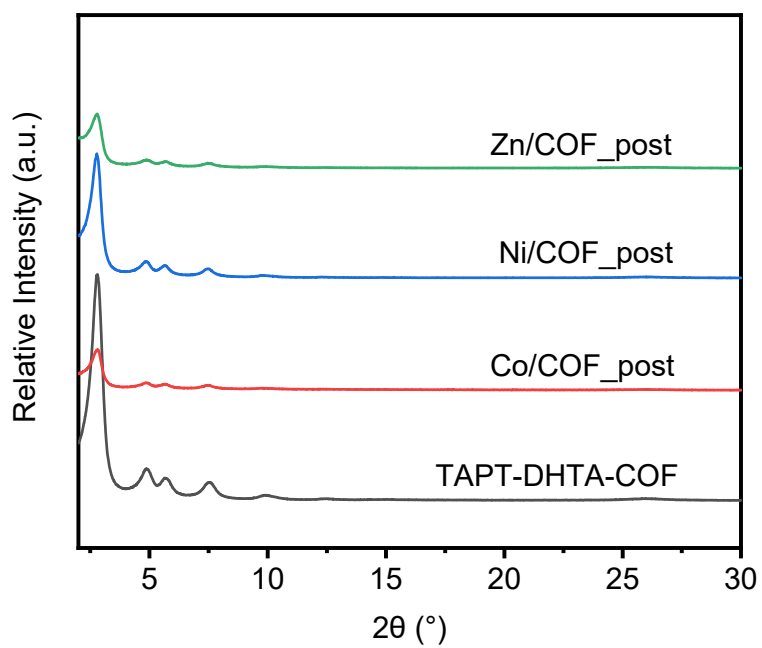

**Fig. S17.** XRD patterns of M/COF\_post materials.



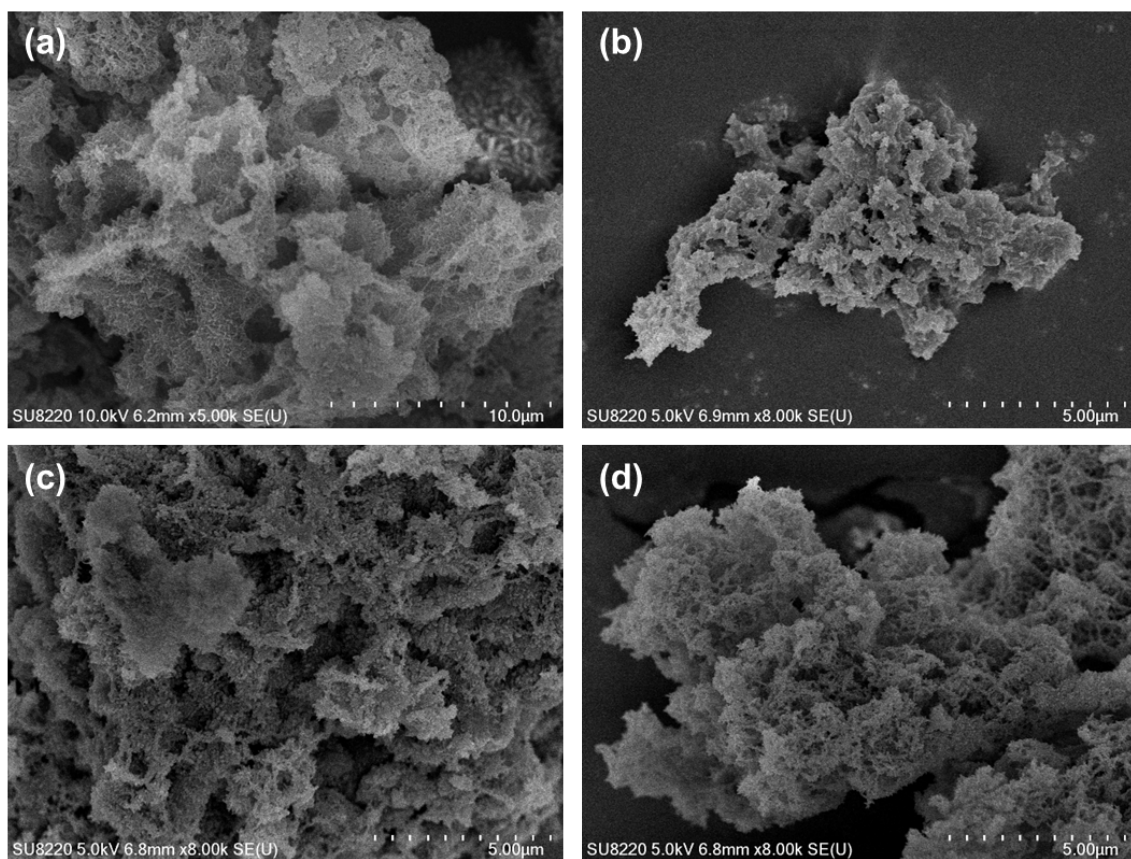

**Fig. S18.** SEM images of (a) TAPT-DHTA-COF, (b) Co/COF\_post, (c) Ni/COF\_post and (d) Zn/COF\_post.

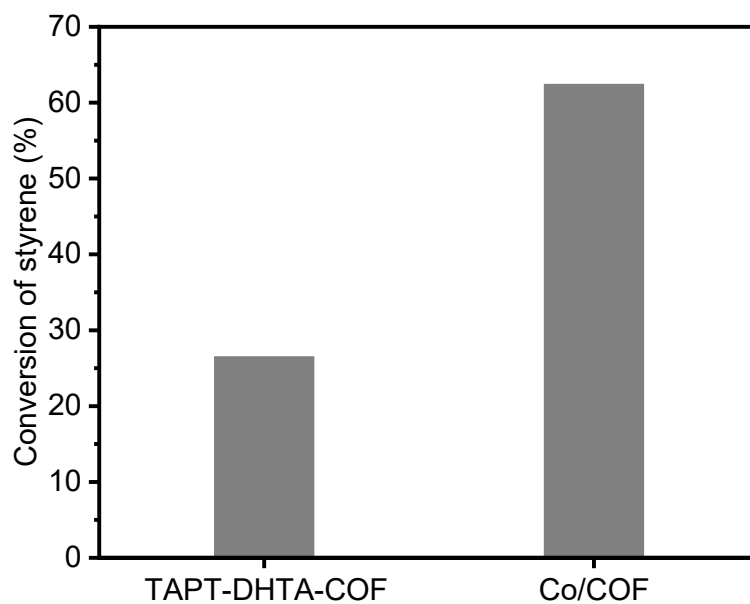

**Fig. S19.** Conversion of styrene towards styrene epoxidation reaction. Reaction conditions: styrene (2 mmol), catalysts (10 mg), TBHP in decane (1 mL), N<sub>2</sub> (balloon pressure, 1 bar), 80 °C, 4 h.

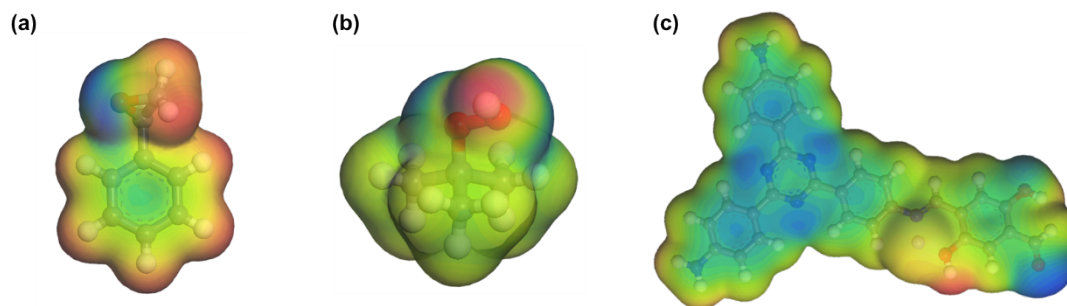

**Fig. S20.** Electrostatic potential distributions of (a) styrene oxide, (b) TBHP and (c) Co/COF.

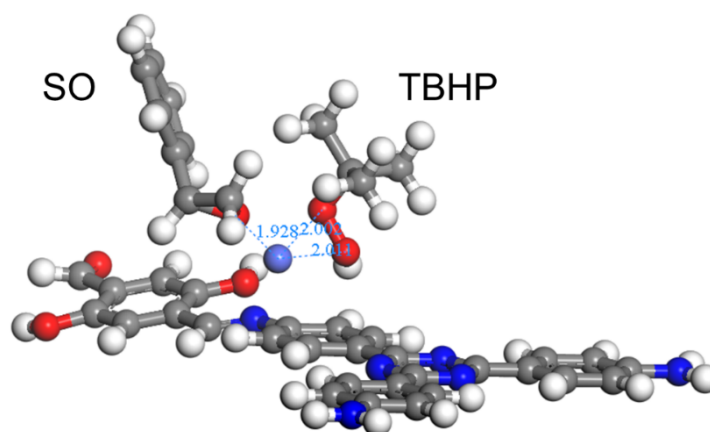

**Fig. S21.** The calculated distance between SO/TBHP and Co/COF.

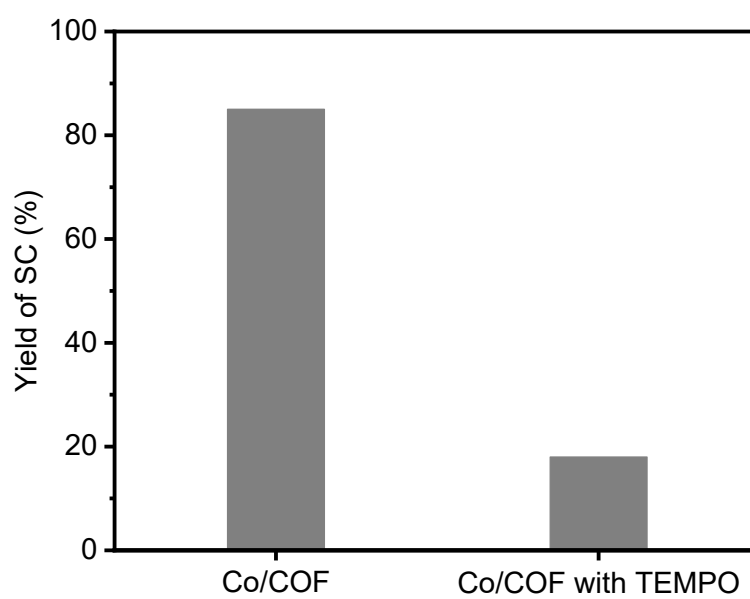

**Fig. S22.** Change in catalytic performances of COF/Co with 2,2,6,6-Tetramethylpiperidine 1oxyl (TEMPO).

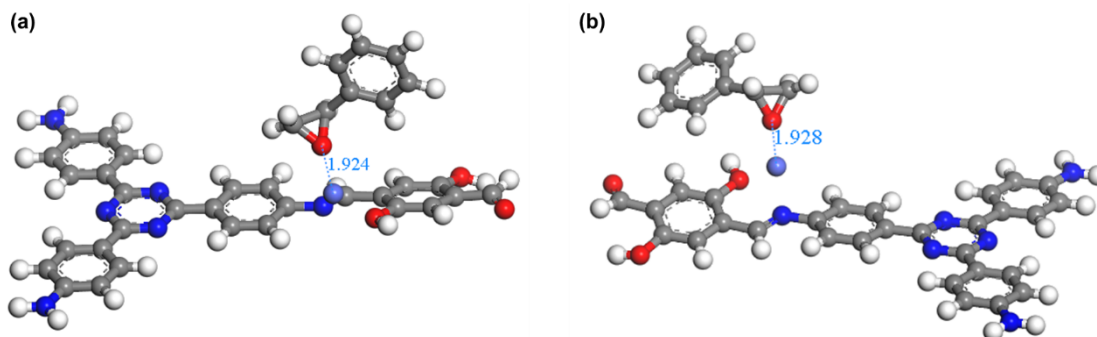

**Fig. S23.** The optimal results of the interaction of SO with (a) Co sites and (b) -OH sites.

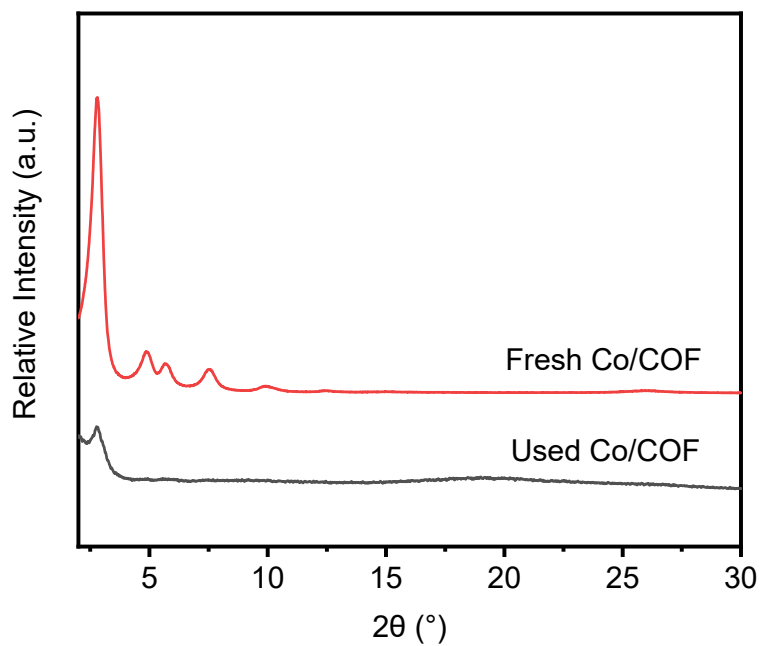

**Fig. S24.** XRD pattern of Co/COF after being used.

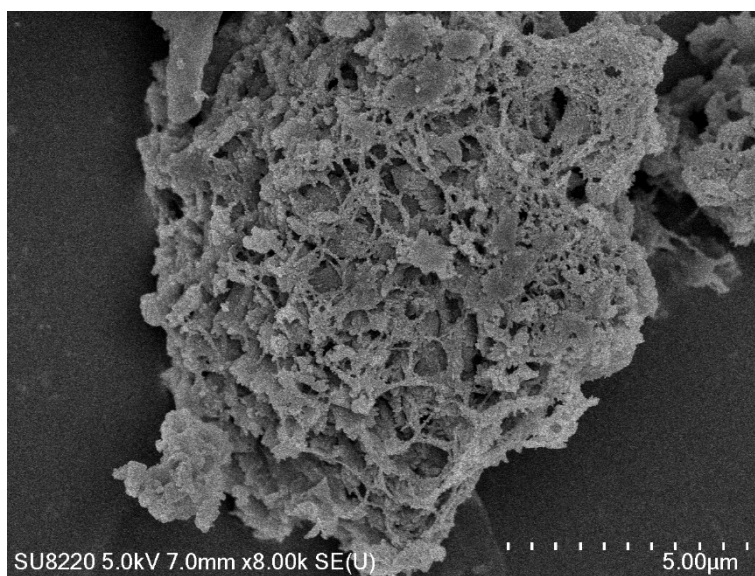

**Fig. S25.** SEM image of Co/COF after being used.

**Table S1.** Physicochemical properties of TAPT-DHTA-COF series.

| Sample        | Metal content (wt%) | $S_{\text{BET}}$ ( $\text{m}^2 \text{g}^{-1}$ ) | $V_t$ ( $\text{cm}^3 \text{g}^{-1}$ ) | $\text{CO}_2$ uptake at 298 K ( $\text{mmol g}^{-1}$ ) |
|---------------|---------------------|-------------------------------------------------|---------------------------------------|--------------------------------------------------------|
| TAPT-DHTA-COF | -                   | 1641                                            | 1.66                                  | 0.76                                                   |
| Co/COF        | 0.56                | 1701                                            | 1.71                                  | 0.93                                                   |
| Ni/COF        | 2.55                | 1601                                            | 1.58                                  | 0.77                                                   |
| Zn/COF        | 0.60                | 1767                                            | 1.68                                  | 0.86                                                   |

**Table S2.** Physicochemical properties of TAPT-DHDA-COF series.

| Sample           | $S_{\text{BET}}$ ( $\text{m}^2 \text{g}^{-1}$ ) | $V_t$ ( $\text{cm}^3 \text{g}^{-1}$ ) | $\text{CO}_2$ uptake at 298 K ( $\text{mmol g}^{-1}$ ) |
|------------------|-------------------------------------------------|---------------------------------------|--------------------------------------------------------|
| TAPT-DHDA-COF    | 540                                             | 0.57                                  | 0.61                                                   |
| Co/TAPT-DHDA-COF | 1253                                            | 1.43                                  | 0.74                                                   |
| Ni/TAPT-DHDA-COF | 880                                             | 1.20                                  | 0.64                                                   |
| Zn/TAPT-DHDA-COF | 1496                                            | 1.86                                  | 0.75                                                   |

**Table S3.** COFs catalyzed one-pot reaction of styrene and  $\text{CO}_2$ .<sup>a</sup>

| Entry | Catalyst         | Conversion of styrene (%) | Yield of SC (%) |
|-------|------------------|---------------------------|-----------------|
| 1     | TAPT-DHDA-COF    | 87                        | 53              |
| 2     | Co/TAPT-DHDA-COF | 95                        | 84              |
| 3     | Ni/TAPT-DHDA-COF | 87                        | 70              |
| 4     | Zn/TAPT-DHDA-COF | 90                        | 75              |

<sup>a</sup> Reaction conditions: styrene (2 mmol), catalysts (10 mg), TBHP in decane (1 mL),  $\text{CO}_2$  (balloon pressure, 1 bar), 80 °C, 24 h.

**Table S4.** COFs catalyzed one-pot reaction of styrene and  $\text{CO}_2$ .<sup>a</sup>

| Entry | Catalyst | Conversion of styrene (%) | Yield of SC (%) |
|-------|----------|---------------------------|-----------------|
|-------|----------|---------------------------|-----------------|

|   |               |    |    |
|---|---------------|----|----|
| 1 | TAPT-DHTA-COF | 87 | 56 |
| 2 | Co/COF_post   | 97 | 71 |
| 3 | Ni/COF_post   | 84 | 55 |
| 4 | Zn/COF_post   | 86 | 55 |

<sup>a</sup> Reaction conditions: styrene (2 mmol), catalysts (10 mg), TBHP in decane (1 mL), CO<sub>2</sub> (balloon pressure, 1 bar), 80 °C, 24 h.

**Table S5.** Comparison of Co/COF against other reported heterogeneous catalysts for the one-pot tandem catalysis.

| Catalyst + co-catalyst                                           | T (°C) | P (bar) | t (h) | Conv. of sty. (%) | Yield of SC (%) | Ref.      |
|------------------------------------------------------------------|--------|---------|-------|-------------------|-----------------|-----------|
| CeO <sub>2</sub> + TBAB                                          | 80     | 20      | 24    | 97                | 90              | [1]       |
| Titanium-silicate + TBAB                                         | 70     | 8       | 48    | 92                | 64              | [2]       |
| Co(acac) <sub>2</sub> -QPB@MCS                                   | 100    | 35      | 48    | 95                | 66              | [3]       |
| ADD-FeAl + TBAB                                                  | 70     | 5       | 8     | 97                | 88              | [4]       |
| N(CH <sub>3</sub> ) <sub>2</sub> -[Im][HCO <sub>3</sub> ]@SBA-15 | 80     | 10      | 28    | 95                | 82              | [5]       |
| ImBr-MOF-545(Mn)                                                 | 60     | 5       | 10    | 99                | 94              | [6]       |
| ZnW PY11 + TBAB                                                  | 50     | 5       | 96    | 92                | 73              | [7]       |
| CSMCRI-10 + TBAB                                                 | 80     | 8       | 8     | 93                | 88              | [8]       |
| Co(II)@CSUST-2 + TBAB                                            | 75     | 1       | 12    | 98                | 84              | [9]       |
| Cr-MIL-101 + TBAB                                                | 24     | 8       | 24    | 39                | 7               | [10]      |
| MOF-590 + TBAB                                                   | 80     | 1       | 10    | 93                | 87              | [11]      |
| Fe <sup>III</sup> @MOF1 + TBAB                                   | 50     | 8       | 24    | 99                | 64              | [12]      |
| NiBDC NS + TBAB                                                  | 80     | 1       | 12    | 95                | 87              | [13]      |
| CoBDC                                                            | 100    | 1       | 12    | 92                | 85              | [14]      |
| Zr-BTB/PA-Co                                                     | 80     | 1       | 12    | 94                | 93              | [15]      |
| Co/COF                                                           | 80     | 1       | 24    | 99                | 85              | This work |

## References

- 1 S. Zhang, Z. Xia, Y. Zou, F. Cao, Y. Liu, Y. Ma and Y. Qu, *J. Am. Chem. Soc.*, 2019, **141**, 11353-

- 11357.
- 2 N. V. Maksimchuk, I. D. Ivanchikova, A. B. Ayupov and O. A. Kholdeeva, *Appl. Catal. B-Environ.*, 2016, **181**, 363-370.
  - 3 S. Kumar, N. Singhal, R. K. Singh, P. Gupta, R. Singh and S. L. Jain, *Dalton T.*, 2015, **44**, 11860-11866.
  - 4 Q. Yang, Z. Lu, L. Chen, Y. Wang, Z. Tian, K. Tong, X. Tang, N. Zhang, J. Zhou, L. Zhang, Q. Zhang, S. Dai and Y. Lin, *Nano Lett.*, 2022, **22**, 8381-8388.
  - 5 Z. Tianxiang, L. Guangcai, L. Hua, X. Wenjie and H. Xingbang, *Micropor. Mesopor. Mater.*, 2023, **293**, 109779.
  - 6 K. Yu, P. Puthiaraj and W.-S. Ahn, *Appl. Catal. B-Environ.*, 2020, **273**, 119059.
  - 7 Q. Han, B. Qi, W. Ren, C. He, J. Niu and C. Duan, *Nat. Commun.*, 2015, **6**, 10007.
  - 8 N. Seal, K. Karthick, M. Singh, S. Kundu and S. Neogi, *Chem. Eng. J.*, 2022, **429**, 132301.
  - 9 H.-G. Jin, F. Chen, H. Zhang, W. Xu, Y. Wang, J. Fan and Z.-S. Chao, *J. Mater. Sci.*, 2020, **55**, 16184-16196.
  - 10 O. V. Zalomaeva, N. V. Maksimchuk, A. M. Chibiryaev, K. A. Kovalenko, V. P. Fedin and B. S. Balzhinimaev, *J. Energy Chem.*, 2013, **22**, 130-135.
  - 11 H. T. D. Nguyen, Y. B. N. Tran, H. N. Nguyen, T. C. Nguyen, F. Gandara and P. T. K. Nguyen, *Inorg. Chem.*, 2018, **57**, 13772-13782.
  - 12 N. Sharma, S. S. Dhankhar, S. Kumar, T. J. D. Kumar and C. M. Nagaraja, *Chem.-A Eur. J.*, 2018, **24**, 16662-16669.
  - 13 Y. Yu, X. Chen, X. Wang, X. Feng, S. Liu, C. Duan, Y. Wu and H. Xi, *Chem. Eng. Sci.*, 2023, **278**, 118898.
  - 14 X. Chen, S. Liu, C. Duan, Y. Yu and H. Xi, *Ind. Eng. Chem. Res.*, 2024, **63**, 5629-5636.
  - 15 Y. Yu, X. Feng, Z. Xie, Y. Wu and H. Xi, *AIChE J.* 2023, **70**, e18290.
